# Supplementary material
Source: publisher figshare collection journal article supplement (https://plos.figshare.com/articles/dataset/_/1491565)
Supplement: Supplementary file [file 1]

In EVOS you can assess **one** of your important social systems (partnership, family, work team etc.). EVOS is applicable, whenever two or more people affiliated with each other, when they live or work together.

**Please choose one of your following social systems you are belonging to for answering this questionnaire:**

- ...your partnership ☐
- ...your family ☐ \_\_\_\_ (number of members)
- ...your work team ☐ \_\_\_\_ (number of members)
- ...other ☐ \_\_\_\_ (number of members)

**You are member of this social system (partnership, family, work team or other)**

since: \_\_\_\_\_ (e.g. March 2012)

Please refer to the **last two weeks** when answering the questions. For every statement, mark the answer that comes closest to your experience. If in doubt, follow your first impulse. Please take a moment at the end to **make sure you have ticked a box in every line.**

|                                                                                 | <b>very poor</b>                                                                      | <b>poor</b>                                                                           | <b>good</b>                                                                           | <b>very good</b>                                                                      |
|---------------------------------------------------------------------------------|---------------------------------------------------------------------------------------|---------------------------------------------------------------------------------------|---------------------------------------------------------------------------------------|---------------------------------------------------------------------------------------|
| 1. For me, the way we talk with each other, is ...                              |    |    |    |    |
| 2. For me, the way we stick together, is ...                                    |    |    |    |    |
| 3. For me, what we do for each other, is ...                                    |    |    |    |    |
| 4. For me, the feeling between us, is ...                                       |    |    |    |    |
| 5. For me, the way we decide what needs to be done, is ...                      |   |   |   |   |
| 6. For me, the way we recognize what will help us in reaching our goals, is ... |  |  |  |  |
| 7. For me, the way we make decisions, is ...                                    |  |  |  |  |
| 8. For me, the way we find solutions to problems, is ...                        |  |  |  |  |
| 9. For me, how we adapt to change, is ...                                       |  |  |  |  |
| 10. I think we will give similar responses to these questions.                  | <b>Strongly disagree</b><br><input type="checkbox"/>                                  | <b>Disagree</b><br><input type="checkbox"/>                                           | <b>Agree</b><br><input type="checkbox"/>                                              | <b>Strongly agree</b><br><input type="checkbox"/>                                     |
