# Supplementary material
Source: publisher figshare collection journal article supplement (https://plos.figshare.com/articles/dataset/_/1491565)
Supplement: Supplementary file [file 1]

In EVOS können Sie eines Ihrer für Sie wichtigen **sozialen Systeme** (Paarbeziehung, Familie oder Arbeitsteam o.a.) einschätzen. Er ist überall anwendbar, wo zwei oder mehr Menschen miteinander verbunden sind, zusammen leben oder arbeiten.

**Bitte entscheiden Sie sich beim Beantworten für eines Ihrer folgenden sozialen Systeme:**

- ...Ihre Paarbeziehung ☐
- ...Ihre Familie ☐ \_\_\_\_\_ (Mitgliederzahl)
- ...Ihr Arbeitsteam ☐ \_\_\_\_\_ (Mitgliederzahl)
- ...Sonstiges/Welches \_\_\_\_\_ ☐ \_\_\_\_\_ (Mitgliederzahl)

**Sie sind Mitglied dieses Systems (Paarbeziehung, Familie, Arbeitsteam o.a.)**

seit: \_\_\_\_\_ (z.B. März 2012)

Bitte denken Sie bei jeder Aussage an **nur eines Ihrer sozialen Systeme** (entweder Ihre Paarbeziehung, Ihre Familie oder Ihr Arbeitsteam o.a.) in den **letzten 14 Tagen**. Bitte beantworten Sie **alle** Aussagen mit **einem** Kreuz, selbst wenn Sie sich Ihrer Einschätzung nicht völlig sicher sind.

|                                                                                  | nicht gut                                                                             | eher nicht gut                                                                        | eher gut                                                                              | gut                                                                                   |
|----------------------------------------------------------------------------------|---------------------------------------------------------------------------------------|---------------------------------------------------------------------------------------|---------------------------------------------------------------------------------------|---------------------------------------------------------------------------------------|
| 1. Wie wir miteinander reden, finde ich ...                                      |    |    |    |    |
| 2. Unseren Zusammenhalt finde ich ...                                            |    |    |    |    |
| 3. Was wir füreinander tun, finde ich ...                                        |    |    |    |    |
| 4. Die Stimmung unter uns finde ich ...                                          |    |    |    |    |
| 5. Wie wir verabreden, was getan werden soll, finde ich...                       |    |    |    |    |
| 6. Wie wir erkennen, was uns beim Erreichen unserer Ziele hilft, finde ich ...   |  |  |  |  |
| 7. Wie wir Entscheidungen treffen, finde ich ...                                 |  |  |  |  |
| 8. Wie wir neue Lösungswege finden, finde ich ...                                |  |  |  |  |
| 9. Wie wir uns auf Veränderungen einstellen, finde ich ...                       |  |  |  |  |
| 10. Ich denke, dass wir (die Systemmitglieder) diese Fragen ähnlich beantworten. | stimmt nicht<br><input type="checkbox"/>                                              | stimmt eher nicht<br><input type="checkbox"/>                                         | stimmt eher<br><input type="checkbox"/>                                               | stimmt genau<br><input type="checkbox"/>                                              |
